# Supplementary material
Source: publisher figshare collection journal article supplement (https://acs.figshare.com/ndownloader/files/4295095)

Table 1. Particle radii determined by TEM, organic content determined by thermogravimetry analysis and features determined by fitting magnetization data to Langevin function for the different magnetite nanoparticle samples.

| Sample         | <i>Langevin fit</i> |               |                                              |          |
|----------------|---------------------|---------------|----------------------------------------------|----------|
|                | <i>D (nm)</i>       | $\sigma$ (nm) | <i>Ms (emu/gFe<sub>3</sub>O<sub>4</sub>)</i> | $\chi^2$ |
| MNP16 $\pm$ 31 | 8.4                 | 2.4           | 64.9                                         | 4.390    |
| MNP18 $\pm$ 1  | 6.2                 | 1.6           | 74.2                                         | 4.446    |
| MNP30 $\pm$ 12 | 5.7                 | 1.7           | 73.9                                         | 11.57    |
| MNP41 $\pm$ 16 | 4.1                 | 0.9           | 70.3                                         | 0.452    |

**Figure 1.** Preparation scheme of the magnetite monolayer film and TEM micrograph of the resulting monolayer.

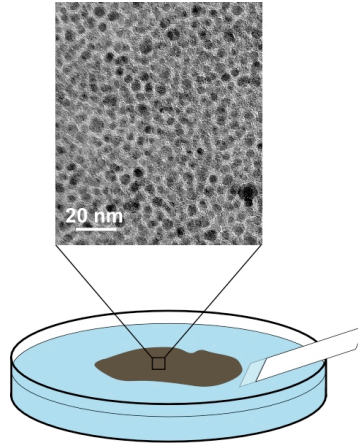

**Figure 2.** Thermal decomposition in air atmosphere for samples MNP18, MNP30, MNP40, MNP41 and in Ar atmosphere for sample MNP16.

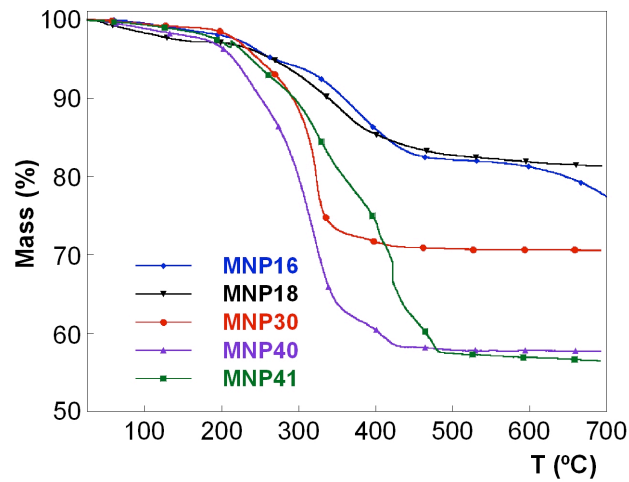

Supplement: Supplementary file 1 [file 4295095]
